# Supplementary material
Source: PubMed Central journal article supplement (PMC5912296)
Supplement: Logistic_regression_tables_28viii17.pdf [file Logistic_regression_tables_28viii17.pdf]

Supplementary Table S1. Odds ratio (OR) and 95% confidence interval (95% CI) for predictors of mild and moderate-to-severe depressive symptomatology according to multinomial logistic regression.

| Variable          | PHQ-9: 5-9 (n = 62) |                | PHQ-9: 10+ (n = 57) |                |
|-------------------|---------------------|----------------|---------------------|----------------|
|                   | OR                  | (95% CI)       | OR                  | (95% CI)       |
| HQoL              | 1.574*              | (1.066, 2.324) | 2.053*              | (1.289, 3.270) |
| Sleep (hr)        | 1.213               | (.924, 1.593)  | 1.942*              | (1.419, 2.658) |
| Education         | 1.326               | (.676, 2.601)  | 1.502               | (.670, 3.367)  |
| Employment status | 0.953               | (.422, 2.152)  | 3.258*              | (1.360, 7.801) |
| cART adherence    | 1.493               | (.397, 5.618)  | 1.500               | (.353, 6.378)  |
| Diabetes          | 3.049               | (.885, 10.507) | 2.238               | (.557, 8.987)  |
| Dom. Violence     | 0.943               | (.442, 2.014)  | 1.977               | (.841, 4.649)  |
| HAND              | 0.449               | (.185, 1.089)  | 1.336               | (.551, 3.239)  |

-Reference category is PHQ-9: 0-4 (n = 146).

- $\chi^2(df) = 84.86 (16), p < 0.001$ , Nagelkerke  $R^2 = 0.34$ .

*Note.* cART = combination antiretroviral therapy; Dom. = domestic; HAND = HIV-associated neurocognitive disorders; HQoL = Health-related quality of life.

\* significant predictor at  $p < 0.05$ .

Supplementary Table S2. Odds ratio (OR) and 95% confidence interval (95% CI) for predictors of depressive symptomatology (n = 119) according to binomial logistic regression.

| Variable          | PHQ-9: 5+ (n = 119) |                |
|-------------------|---------------------|----------------|
|                   | OR                  | (95% CI)       |
| HQoL              | 1.762*              | (1.256, 2.471) |
| Sleep (hr)        | 1.488*              | (1.179, 1.877) |
| Education         | 1.408               | (.780, 2.543)  |
| Employment status | 1.666               | (.850, 3.266)  |
| cART adherence    | 1.645               | (.504, 5.374)  |
| Diabetes          | 2.733               | (.889, 8.403)  |
| Dom. Violence     | 1.287               | (.675, 2.453)  |
| HAND              | .728                | (.365, 1.454)  |

-Reference category is PHQ-9: 0-4.

- $\chi^2(df) = 51.37(8)$ ,  $p < 0.001$ , Nagelkerke  $R^2 = 0.26$ .

*Note.* cART = combination antiretroviral therapy; Dom. = domestic; HAND = HIV-associated neurocognitive disorders; HQoL = Health-related quality of life.

Supplementary Table S2. Odds ratio (OR) and 95% confidence interval (95% CI) for predictors of moderate-to-severe compared to mild depressive symptomatology according to binomial logistic regression.

| Variable          | PHQ-9: 10+ (n = 57) |                |
|-------------------|---------------------|----------------|
|                   | OR                  | (95% CI)       |
| HQoL              | 1.280               | (.754, 2.174)  |
| Sleep (hr)        | 1.487*              | (1.073, 2.061) |
| Education         | 1.315               | (.539, 3.210)  |
| Employment status | 3.583*              | (1.331, 9.646) |
| cART adherence    | 1.311               | (.281, 6.103)  |
| Diabetes          | .535                | (.134, 2.135)  |
| Dom. Violence     | 2.027               | (.767, 5.357)  |
| HAND              | 2.959*              | (1.009, 8.677) |

-Reference category is PHQ-9: 5-9 (n = 62).

- $X^2(df) = 31.53 (8)$ ,  $p < 0.001$ , Nagelkerke  $R^2 = 0.34$ .

*Note.* cART = combination antiretroviral therapy; Dom. = domestic; HAND = HIV-associated neurocognitive disorders; HQoL = Health-related quality of life.
